# Supplementary material for: Stratospheric ozone loss in the Arctic winters between 2005 and 2013 derived with ACE-FTS measurements
Source: Copernicus journal article supplement (doi:10.5194/acp-19-577-2019), 2019-01-16
Supplement: Supplementary file 1 [file acp-19-577-2019-supplement.pdf]

Supplement of Atmos. Chem. Phys., 19, 577–601, 2019  
<https://doi.org/10.5194/acp-19-577-2019-supplement>  
© Author(s) 2019. This work is distributed under  
the Creative Commons Attribution 4.0 License.

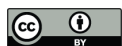

*Supplement of*

## **Stratospheric ozone loss in the Arctic winters between 2005 and 2013 derived with ACE-FTS measurements**

**Debora Griffin et al.**

*Correspondence to:* Kaley A. Walker (kaley.walker@utoronto.ca)

The copyright of individual parts of the supplement might differ from the CC BY 4.0 License.

**Table S1.** Linear combination needed to obtain the artificial Tracer 1 that is linearly correlated with ozone (in ppbv), estimated for each year.

| Year | $[\text{CH}_4]_{ppb}$ | $[\text{N}_2\text{O}]_{ppb}$ | $[\text{CCl}_2\text{F}_2]_{ppt}$ | $[\text{CCl}_3\text{F}]_{ppt}$ | intercept | $R^2$ |
|------|-----------------------|------------------------------|----------------------------------|--------------------------------|-----------|-------|
| 2005 | $7.23 \times 10^{-3}$ | $-2.28 \times 10^{-2}$       | $-2.14 \times 10^{-3}$           | $-1.16 \times 10^{-2}$         | 0.24      | 0.81  |
| 2007 | $3.31 \times 10^{-3}$ | $5.35 \times 10^{-3}$        | $-1.34 \times 10^{-2}$           | $-8.83 \times 10^{-3}$         | 1.69      | 0.87  |
| 2008 | $3.31 \times 10^{-3}$ | $5.35 \times 10^{-3}$        | $-1.34 \times 10^{-2}$           | $-8.83 \times 10^{-3}$         | 1.69      | 0.87  |
| 2010 | $1.14 \times 10^{-3}$ | $-7.65 \times 10^{-3}$       | $9.38 \times 10^{-4}$            | $-1.14 \times 10^{-2}$         | 2.81      | 0.88  |
| 2011 | $9.34 \times 10^{-4}$ | $-7.45 \times 10^{-4}$       | $-3.41 \times 10^{-3}$           | $-9.46 \times 10^{-3}$         | 2.86      | 0.90  |

**Table S2.** Linear combination needed to obtain the artificial Tracer 4 that is linearly correlated with ozone (in ppbv), estimated for each year.

| Year | $[\text{CH}_4]_{ppb}$ | $[\text{N}_2\text{O}]_{ppb}$ | $[\text{OCS}]_{ppt}$   | $[\text{CCl}_2\text{F}_2]_{ppt}$ | intercept | $R^2$ |
|------|-----------------------|------------------------------|------------------------|----------------------------------|-----------|-------|
| 2005 | $7.80 \times 10^{-3}$ | $-3.77 \times 10^{-2}$       | $4.51 \times 10^{-3}$  | $-1.60 \times 10^{-2}$           | 0.11      | 0.81  |
| 2007 | $2.78 \times 10^{-3}$ | $-1.14 \times 10^{-2}$       | $-1.99 \times 10^{-3}$ | $-1.13 \times 10^{-2}$           | 2.11      | 0.85  |
| 2008 | $2.78 \times 10^{-3}$ | $-1.14 \times 10^{-2}$       | $-1.99 \times 10^{-3}$ | $-1.13 \times 10^{-2}$           | 2.11      | 0.85  |
| 2010 | $1.78 \times 10^{-4}$ | $1.39 \times 10^{-3}$        | $-4.84 \times 10^{-3}$ | $-6.56 \times 10^{-3}$           | 3.09      | 0.89  |
| 2011 | $2.22 \times 10^{-4}$ | $-5.03 \times 10^{-4}$       | $-3.91 \times 10^{-3}$ | $-6.05 \times 10^{-3}$           | 3.15      | 0.90  |

**Table S3.** Average vortex descent (in K/1.5 months) estimated with  $\text{CH}_4$ .

| Year | 380-400 K | 400-420 K | 420-440K | 440-460 K | 460-480 K | 480-500 K | 500-520 K | 520-540 K |
|------|-----------|-----------|----------|-----------|-----------|-----------|-----------|-----------|
| 2005 | 5.46      | 4.91      | 1.53     | 3.17      | -5.67     | -16.66    | -20.75    | -31.84    |
| 2007 | -2.75     | -0.75     | -4.23    | -7.43     | -10.05    | -7.49     | -11.38    | -6.42     |
| 2008 | -1.04     | -3.08     | -9.63    | -10.69    | -22.21    | -27.44    | -29.48    | -31.93    |
| 2010 | 0.98      | 1.34      | -2.36    | -3.48     | -9.01     | -12.23    | -12.55    | -18.94    |
| 2011 | 2.30      | -5.17     | -9.28    | -10.93    | -18.06    | -24.67    | -26.60    | -26.13    |

**Table S4.** Average vortex descent (in K/1.5 months) estimated with  $\text{N}_2\text{O}$ .

| Year | 380-400 K | 400-420 K | 420-440K | 440-460 K | 460-480 K | 480-500 K | 500-520 K | 520-540 K |
|------|-----------|-----------|----------|-----------|-----------|-----------|-----------|-----------|
| 2005 | 5.71      | 4.68      | -0.39    | 3.21      | -4.98     | -13.07    | -12.72    | -22.26    |
| 2007 | -3.81     | -0.57     | -3.89    | -7.95     | -6.76     | -3.44     | 1.33      | 7.87      |
| 2008 | -0.28     | -2.88     | -10.63   | -12.71    | -23.38    | -26.59    | -23.03    | -21.85    |
| 2010 | 1.34      | 1.88      | -2.29    | -4.19     | -8.01     | -7.69     | -4.58     | -7.60     |
| 2011 | 6.10      | -3.98     | -8.43    | -11.73    | -18.81    | -24.34    | -22.91    | -19.90    |

**Table S5.** Average vortex descent (in K/1.5 months) estimated with HF.

| Year | 380-400 K | 400-420 K | 420-440K | 440-460 K | 460-480 K | 480-500 K | 500-520 K | 520-540 K |
|------|-----------|-----------|----------|-----------|-----------|-----------|-----------|-----------|
| 2005 | 5.08      | 2.17      | -2.37    | 1.40      | -7.39     | -16.13    | -21.33    | -30.35    |
| 2007 | -3.04     | -3.34     | -9.70    | -14.10    | -21.23    | -15.94    | -32.31    | -32.97    |
| 2008 | -2.43     | -3.06     | -12.70   | -13.75    | -22.39    | -28.40    | -29.12    | -31.41    |
| 2010 | 1.46      | 2.96      | -0.49    | -2.48     | -11.17    | -13.91    | -19.51    | -21.60    |
| 2011 | -7.42     | -7.17     | -13.45   | -16.11    | -21.27    | -25.42    | -26.14    | -24.85    |

**Table S6.** Average vortex descent (in K/1.5 months) estimated with  $\text{CCl}_2\text{F}_2$ .

| Year | 380-400 K | 400-420 K | 420-440K | 440-460 K | 460-480 K | 480-500 K | 500-520 K | 520-540 K |
|------|-----------|-----------|----------|-----------|-----------|-----------|-----------|-----------|
| 2005 | 2.70      | 3.80      | -0.60    | 4.03      | -3.24     | -10.82    | -12.30    | -22.65    |
| 2007 | -8.39     | -3.24     | -3.41    | -8.12     | -6.78     | -1.32     | 4.12      | 9.90      |
| 2008 | -6.33     | -3.66     | -10.20   | -12.88    | -22.88    | -28.36    | -25.74    | -24.16    |
| 2010 | -0.27     | 1.03      | -1.92    | -4.52     | -8.97     | -10.55    | -7.85     | -10.80    |
| 2011 | -3.81     | -4.45     | -8.72    | -12.69    | -19.52    | -24.85    | -22.26    | -19.74    |

**Table S7.** Average vortex descent (in K/1.5 months) estimated with OCS.

| Year | 380-400 K | 400-420 K | 420-440K | 440-460 K | 460-480 K | 480-500 K | 500-520 K | 520-540 K |
|------|-----------|-----------|----------|-----------|-----------|-----------|-----------|-----------|
| 2005 | 10.49     | 6.98      | 0.61     | 10.54     | 5.87      | 2.01      | 2.08      | -8.52     |
| 2007 | -8.22     | 5.49      | -6.33    | -3.68     | 22.14     | 34.45     | 38.06     | 30.14     |
| 2008 | 2.27      | 1.25      | -12.91   | -12.85    | -15.13    | -12.37    | -0.66     | 8.56      |
| 2010 | 2.78      | 6.12      | -2.91    | -1.26     | 0.25      | 7.39      | 15.58     | 5.47      |
| 2011 | 6.45      | 3.37      | -9.75    | -14.45    | -15.26    | -13.26    | -5.79     | -7.20     |

**Table S8.** Average vortex descent (in K/1.5 months) estimated with CCl<sub>3</sub>F.

| Year | 380-400 K | 400-420 K | 420-440K | 440-460 K | 460-480 K | 480-500 K | 500-520 K | 520-540 K |
|------|-----------|-----------|----------|-----------|-----------|-----------|-----------|-----------|
| 2010 | 4.93      | 7.55      | -7.37    | -0.44     | 4.19      | 7.85      | 18.98     | -4.14     |

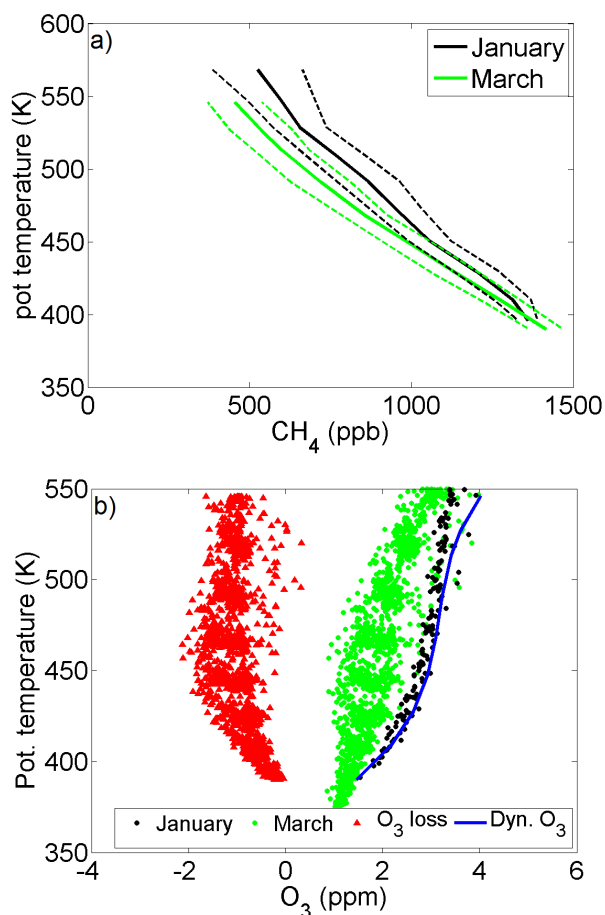

**Figure S1.** Panel (a) shows the monthly average CH<sub>4</sub> profiles observed by ACE-FTS inside the polar vortex in January (black line) and March (green line) 2011 together with the respective standard deviations (shown as dashed lines). Panel (b) displays the observed ACE-FTS ozone in January (black dots) and March (green dots) 2011, the dynamic ozone (blue line) for March 2011, estimated from the average vortex profile descent from CH<sub>4</sub>, and the ozone loss (red triangles; the difference between observed and average passive ozone in March).

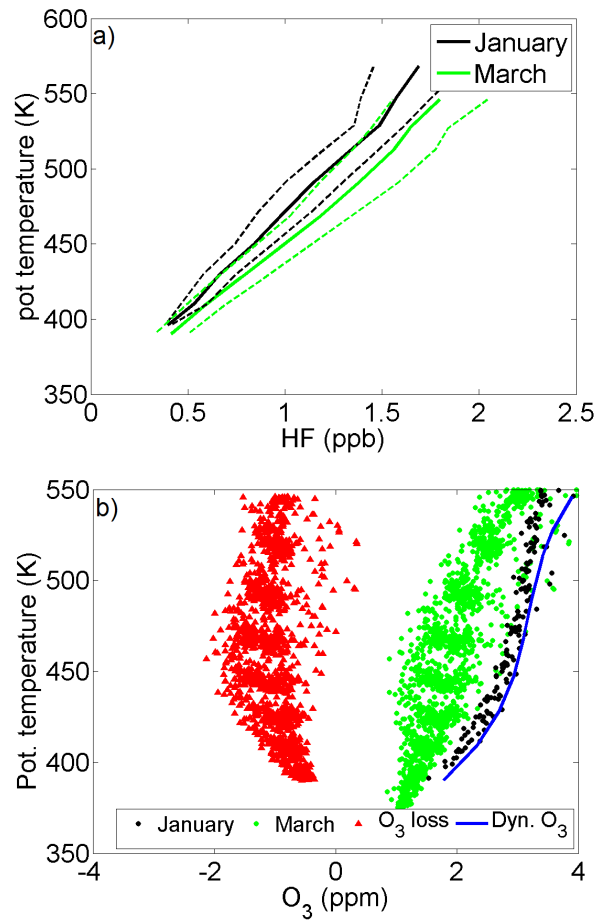

**Figure S2.** Panel (a) shows the monthly average HF profiles observed by ACE-FTS inside the polar vortex in January (black line) and March (green line) 2011 together with the respective standard deviations (shown as dashed lines). Panel (b) displays the observed ACE-FTS ozone in January (black dots) and March (green dots) 2011, the dynamic ozone (blue line) for March 2011, estimated from the average vortex profile descent from HF, and the ozone loss (red triangles; the difference between observed and average passive ozone in March).

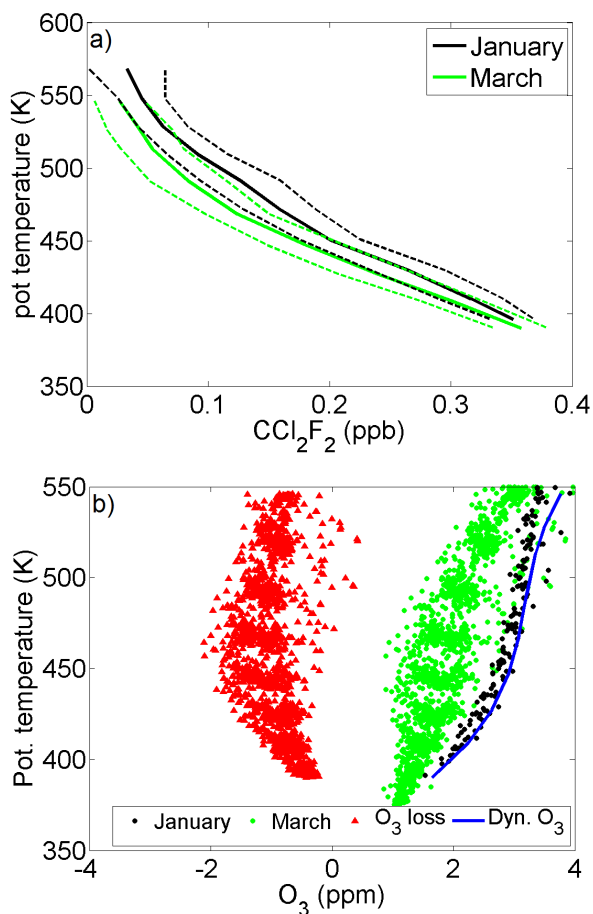

**Figure S3.** Panel (a) shows the monthly average  $\text{CCl}_2\text{F}_2$  profiles observed by ACE-FTS inside the polar vortex in January (black line) and March (green line) 2011 together with the respective standard deviations (shown as dashed lines). Panel (b) displays the observed ACE-FTS ozone in January (black dots) and March (green dots) 2011, the dynamic ozone (blue line) for March 2011, estimated from the average vortex profile descent from  $\text{CCl}_2\text{F}_2$ , and the ozone loss (red triangles; the difference between observed and average passive ozone in March).

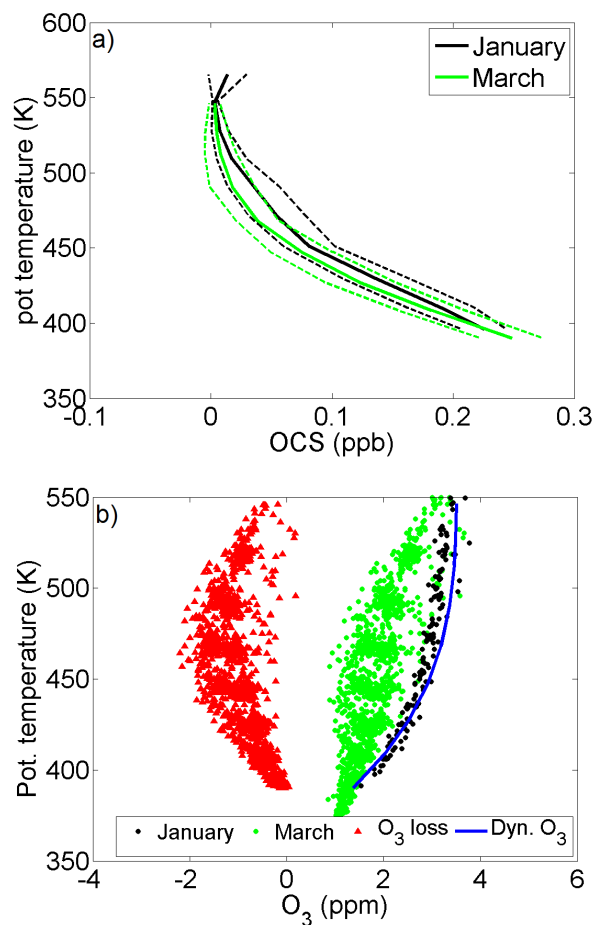

**Figure S4.** Panel (a) shows the monthly average OCS profiles observed by ACE-FTS inside the polar vortex in January (black line) and March (green line) 2011 together with the respective standard deviations (shown as dashed lines). Panel (b) displays the observed ACE-FTS ozone in January (black dots) and March (green dots) 2011, the dynamic ozone (blue line) for March 2011, estimated from the average vortex profile descent from OCS, and the ozone loss (red triangles; the difference between observed and average passive ozone in March).
